# Supplementary material
Source: Springer Nature journal article supplement (https://www.springermedizin.de/resource/supplementary/12978_2013_224_MOESM1_ESM.pdf/9602274)

■ never seen and never used   ■ ever seen but never used   ■ ever used

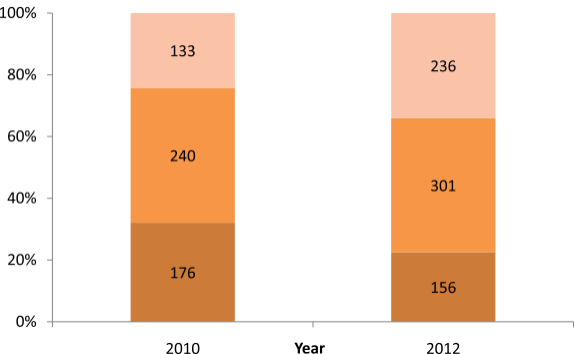

Supplement: MOESM1 [file 9602274]
